# Supplementary material
Source: PubMed Central journal article supplement (PMC6545132)
Supplement: NIHMS1521268-supplement-1.pdf [file NIHMS1521268-supplement-1.pdf]

Table S1: Association between WHO suggested waist circumference cut-off values and clinical ART outcomes (N=264 women, cycles=445)

| Adjusted proportions (mean, 95% CI) <sup>a</sup> | WC≤80      |             | WC>80      |             | P trend |
|--------------------------------------------------|------------|-------------|------------|-------------|---------|
|                                                  | cycles=215 |             | cycles=230 |             |         |
| Implantation                                     | 0.62       | (0.53-0.71) | 0.51*      | (0.42-0.61) | 0.04    |
| Clinical pregnancy                               | 0.57       | (0.48-0.66) | 0.48       | (0.39-0.58) | 0.09    |
| Live birth                                       | 0.48       | (0.38-0.58) | 0.41       | (0.31-0.51) | 0.19    |

  

| Adjusted proportions (mean, 95% CI) <sup>a</sup> | WC≤88      |             | WC>88      |             | P trend |
|--------------------------------------------------|------------|-------------|------------|-------------|---------|
|                                                  | cycles=322 |             | cycles=123 |             |         |
| Implantation                                     | 0.60       | (0.51-0.67) | 0.49       | (0.37-0.61) | 0.08    |
| Clinical pregnancy                               | 0.55       | (0.47-0.63) | 0.46       | (0.34-0.58) | 0.12    |
| Live birth                                       | 0.47       | (0.38-0.55) | 0.38       | (0.27-0.51) | 0.20    |

  

| Adjusted proportions (mean, 95% CI) <sup>a</sup> | Waist circumference (cm) |             |            |             |            |             |         |
|--------------------------------------------------|--------------------------|-------------|------------|-------------|------------|-------------|---------|
|                                                  | WC≤80                    |             | 80<WC≤ 88  |             | WC>88.0    |             | P trend |
|                                                  | cycles=215               |             | cycles=107 |             | cycles=123 |             |         |
| Implantation                                     | 0.62                     | (0.53-0.71) | 0.54       | (0.42-0.65) | 0.49*      | (0.38-0.61) | 0.04    |
| Clinical pregnancy                               | 0.57                     | (0.48-0.66) | 0.51       | (0.39-0.62) | 0.46       | (0.34-0.58) | 0.08    |
| Live birth                                       | 0.48                     | (0.38-0.58) | 0.43       | (0.31-0.56) | 0.38       | (0.27-0.51) | 0.15    |

<sup>a</sup>: All models were adjusted for age, race (white vs. non-white), smoking (ever vs. never), infertility diagnosis (male factor, female factor, unexplained), day 3 FSH, BMI, and height.

WHO: World Health Organization. \*: p<0.05 compared with the first category.

Table S2. Association between waist circumference and probability of clinical ART outcomes (N=264 women, cycles=445)

| <b>Implantation</b>                              |                                         |                              |                             |                |  |  |
|--------------------------------------------------|-----------------------------------------|------------------------------|-----------------------------|----------------|--|--|
| <b>Adjusted proportions (95% CI)<sup>a</sup></b> | <b>Measured waist circumference, cm</b> |                              |                             |                |  |  |
|                                                  | <b>Tertile 1 (&lt;77.0)</b>             | <b>Tertile 2 (77.0-86.0)</b> | <b>Tertile 3 (&gt;86.0)</b> | <b>P trend</b> |  |  |
| <b>Model 1</b>                                   | 0.64 (0.54-0.74)                        | 0.56 (0.46-0.66)             | 0.50* (0.39-0.61)           | 0.03           |  |  |
| <b>Model 2</b>                                   | 0.64 (0.53-0.74)                        | 0.56 (0.45-0.66)             | 0.50* (0.39-0.61)           | 0.03           |  |  |
| <b>Model 3</b>                                   | 0.63 (0.52-0.73)                        | 0.56 (0.45-0.66)             | 0.52 (0.40-0.63)            | 0.14           |  |  |
| <b>Adjusted proportions (95% CI)<sup>a</sup></b> | <b>BMI-adjusted waist circumference</b> |                              |                             |                |  |  |
|                                                  | <b>Tertile 1 (&lt;80.9)</b>             | <b>Tertile 2 (80.9-86.7)</b> | <b>Tertile 3 (&gt;86.7)</b> | <b>P trend</b> |  |  |
| <b>Model 4</b>                                   | 0.66 (0.56-0.75)                        | 0.51* (0.40-0.61)            | 0.52* (0.41-0.63)           | 0.02           |  |  |
| <b>Model 5</b>                                   | 0.66 (0.55-0.75)                        | 0.50* (0.40-0.61)            | 0.53 (0.42-0.64)            | 0.03           |  |  |
| <b>Clinical pregnancy</b>                        |                                         |                              |                             |                |  |  |
| <b>Adjusted proportions (95% CI)<sup>a</sup></b> | <b>Measured waist circumference, cm</b> |                              |                             |                |  |  |
|                                                  | <b>Tertile 1 (&lt;77.0)</b>             | <b>Tertile 2 (77.0-86.0)</b> | <b>Tertile 3 (&gt;86.0)</b> | <b>P trend</b> |  |  |
| <b>Model 1</b>                                   | 0.60 (0.49-0.70)                        | 0.51 (0.41-0.62)             | 0.47* (0.37-0.58)           | 0.06           |  |  |
| <b>Model 2</b>                                   | 0.60 (0.49-0.70)                        | 0.52 (0.41-0.62)             | 0.47* (0.36-0.58)           | 0.05           |  |  |
| <b>Model 3</b>                                   | 0.61 (0.50-0.71)                        | 0.52 (0.41-0.62)             | 0.46 (0.34-0.58)            | 0.06           |  |  |
| <b>Adjusted proportions (95% CI)<sup>a</sup></b> | <b>BMI-adjusted waist circumference</b> |                              |                             |                |  |  |
|                                                  | <b>Tertile 1 (&lt;80.9)</b>             | <b>Tertile 2 (80.9-86.7)</b> | <b>Tertile 3 (&gt;86.7)</b> | <b>P trend</b> |  |  |
| <b>Model 4</b>                                   | 0.62 (0.52-0.72)                        | 0.48* (0.37-0.58)            | 0.47* (0.36-0.58)           | 0.01           |  |  |
| <b>Model 5</b>                                   | 0.62 (0.52-0.72)                        | 0.48* (0.37-0.58)            | 0.47* (0.36-0.58)           | 0.01           |  |  |
| <b>Live birth</b>                                |                                         |                              |                             |                |  |  |

| Adjusted proportions (95% CI) <sup>a</sup> | Measured waist circumference, cm |                       |                   |         |  |  |
|--------------------------------------------|----------------------------------|-----------------------|-------------------|---------|--|--|
|                                            | Tertile 1 (<77.0)                | Tertile 2 (77.0-86.0) | Tertile 3 (>86.0) | P trend |  |  |
| <b>Model 1</b>                             | 0.53 (0.42-0.65)                 | 0.42 (0.32-0.53)      | 0.38* (0.28-0.50) | 0.04    |  |  |
| <b>Model 2</b>                             | 0.53 (0.42-0.65)                 | 0.42 (0.32-0.53)      | 0.38* (0.28-0.50) | 0.04    |  |  |
| <b>Model 3</b>                             | 0.53 (0.41-0.65)                 | 0.42 (0.31-0.53)      | 0.39 (0.27-0.52)  | 0.10    |  |  |

  

| Adjusted proportions (95% CI) <sup>a</sup> | BMI-adjusted waist circumference |                       |                   |         |  |  |
|--------------------------------------------|----------------------------------|-----------------------|-------------------|---------|--|--|
|                                            | Tertile 1 (<80.9)                | Tertile 2 (80.9-86.7) | Tertile 3 (>86.7) | P trend |  |  |
| <b>Model 4</b>                             | 0.53 (0.39-0.62)                 | 0.41 (0.27-0.49)      | 0.38* (0.24-0.48) | 0.03    |  |  |
| <b>Model 5</b>                             | 0.52 (0.41-0.63)                 | 0.41 (0.31-0.52)      | 0.38 (0.28-0.50)  | 0.04    |  |  |

Model 1: Adjusted for age, race (white vs. non-white), smoking (ever vs. never), infertility diagnosis (male factor, female factor, unexplained), day 3 FSH, and height.

Model 2: Model 1 adjusted for BMI residual (waist circumference adjusted BMI).

Model 3: Model 1 adjusted for measured BMI.

Model 4: Adjusted for age, race (white vs. non-white), smoking (ever vs. never), infertility diagnosis (male factor, female factor, unexplained), day 3 FSH, and height.

Model 5: Model 4 adjusted for measured BMI.

\*: p<0.05 compared with the first category.

Table S3. Adjusted probabilities (95% confidence intervals) of implantation, clinical pregnancy and live birth among women undergoing infertility treatment with ART jointly stratified by BMI and WC categories (N=257 women, cycles=435)

| <b>Number of Cycles</b>                          | <b>121</b>            |             | <b>162</b>     |             | <b>13</b>         |             | <b>139</b>     |             |
|--------------------------------------------------|-----------------------|-------------|----------------|-------------|-------------------|-------------|----------------|-------------|
|                                                  | <b>18.5≤BMI&lt;25</b> |             |                |             | <b>BMI≥25</b>     |             |                |             |
| <b>Adjusted proportions (95% CI)<sup>a</sup></b> | <b>WC&lt;77.0</b>     |             | <b>WC≥77.0</b> |             | <b>WC&lt;77.0</b> |             | <b>WC≥77.0</b> |             |
| Implantation                                     | 0.64                  | (0.52-0.74) | 0.55           | (0.45-0.65) | 0.73              | (0.39-0.92) | 0.49*          | (0.38-0.61) |
| Clinical pregnancy                               | 0.61                  | (0.49-0.72) | 0.50           | (0.40-0.60) | 0.66              | (0.35-0.88) | 0.48           | (0.37-0.60) |
| Live birth                                       | 0.54                  | (0.42-0.66) | 0.41           | (0.32-0.52) | 0.54              | (0.24-0.81) | 0.38*          | (0.27-0.50) |

  

| <b>Number of Cycles</b>                          | <b>191</b>            |             | <b>92</b>       |             | <b>17</b>     |             | <b>135</b>      |             |
|--------------------------------------------------|-----------------------|-------------|-----------------|-------------|---------------|-------------|-----------------|-------------|
|                                                  | <b>18.5≤BMI&lt;25</b> |             |                 |             | <b>BMI≥25</b> |             |                 |             |
| <b>Adjusted proportions (95% CI)<sup>a</sup></b> | <b>WC≤80</b>          |             | <b>WC&gt;80</b> |             | <b>WC≤80</b>  |             | <b>WC&gt;80</b> |             |
| Implantation                                     | 0.62                  | (0.52-0.71) | 0.53            | (0.40-0.66) | 0.76          | (0.48-0.91) | 0.48*           | (0.37-0.60) |
| Clinical pregnancy                               | 0.58                  | (0.48-0.67) | 0.48            | (0.35-0.60) | 0.67          | (0.40-0.86) | 0.47            | (0.36-0.59) |
| Live birth                                       | 0.49                  | (0.39-0.59) | 0.43            | (0.30-0.56) | 0.45          | (0.21-0.71) | 0.39            | (0.28-0.51) |

  

| <b>Number of Cycles</b>                          | <b>250</b>            |             | <b>33</b>       |             | <b>34</b>     |             | <b>118</b>      |             |
|--------------------------------------------------|-----------------------|-------------|-----------------|-------------|---------------|-------------|-----------------|-------------|
|                                                  | <b>18.5≤BMI&lt;25</b> |             |                 |             | <b>BMI≥25</b> |             |                 |             |
| <b>Adjusted proportions (95% CI)<sup>a</sup></b> | <b>WC≤86</b>          |             | <b>WC&gt;86</b> |             | <b>WC≤86</b>  |             | <b>WC&gt;86</b> |             |
| Implantation                                     | 0.59                  | (0.50-0.67) | 0.60            | (0.41-0.76) | 0.71          | (0.52-0.85) | 0.45*           | (0.33-0.56) |
| Clinical pregnancy                               | 0.54                  | (0.45-0.63) | 0.53            | (0.35-0.70) | 0.68          | (0.49-0.82) | 0.43            | (0.32-0.55) |
| Live birth                                       | 0.46                  | (0.37-0.55) | 0.49            | (0.31-0.68) | 0.59          | (0.40-0.76) | 0.32*           | (0.22-0.45) |

  

| <b>Number of Cycles</b> | <b>263</b>            |  | <b>20</b> |  | <b>49</b>     |  | <b>103</b> |  |
|-------------------------|-----------------------|--|-----------|--|---------------|--|------------|--|
|                         | <b>18.5≤BMI&lt;25</b> |  |           |  | <b>BMI≥25</b> |  |            |  |

| Adjusted proportions (95% CI) <sup>a</sup> | WC≤88        |             | WC>88       |             | WC≤88       |             | WC>88       |             |
|--------------------------------------------|--------------|-------------|-------------|-------------|-------------|-------------|-------------|-------------|
|                                            | Implantation | 0.59        | (0.50-0.67) | 0.64        | (0.38-0.83) | 0.66        | (0.49-0.79) | 0.45*       |
| Clinical pregnancy                         | 0.54         | (0.46-0.63) | 0.55        | (0.31-0.76) | 0.62        | (0.46-0.76) | 0.43        | (0.32-0.56) |
| Live birth                                 | 0.46         | (0.37-0.55) | 0.56        | (0.32-0.77) | 0.52        | (0.35-0.69) | 0.33        | (0.23-0.46) |

<sup>a</sup>: All models were adjusted for age, race (white vs. non-white), smoking, infertility diagnosis (male factor, female factor, unexplained), day 3 FSH, and height.

\*: p<0.05 compared with the first category.

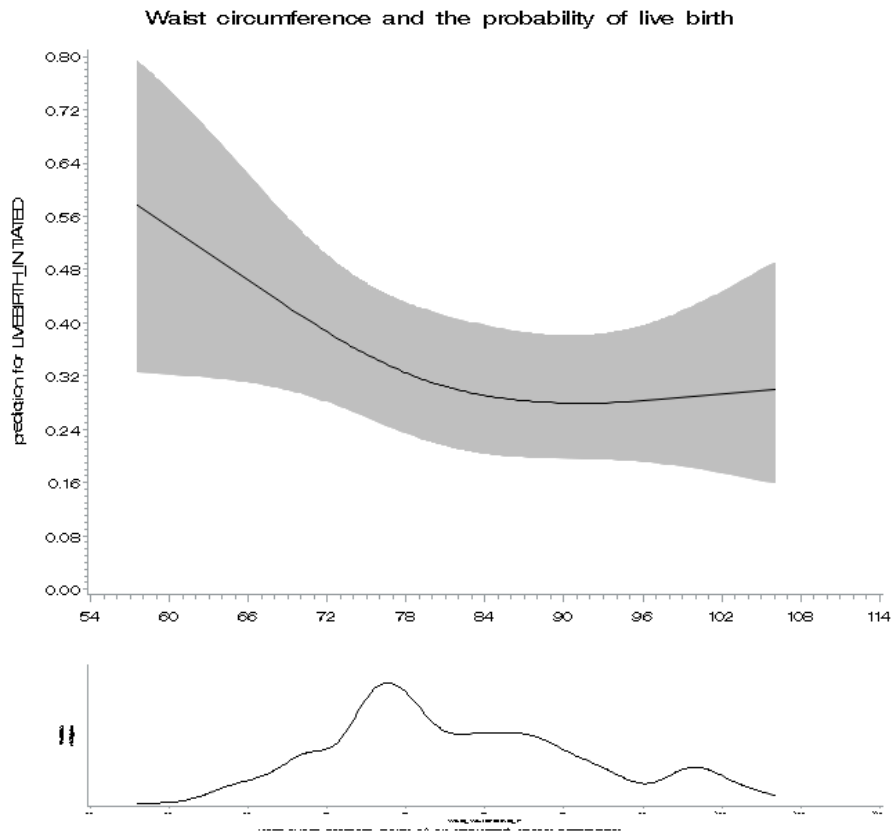

Figure S1. Restricted cubic spline plot of the association between waist circumference and probability of live birth. P-value for non-linear relation: 0.20.

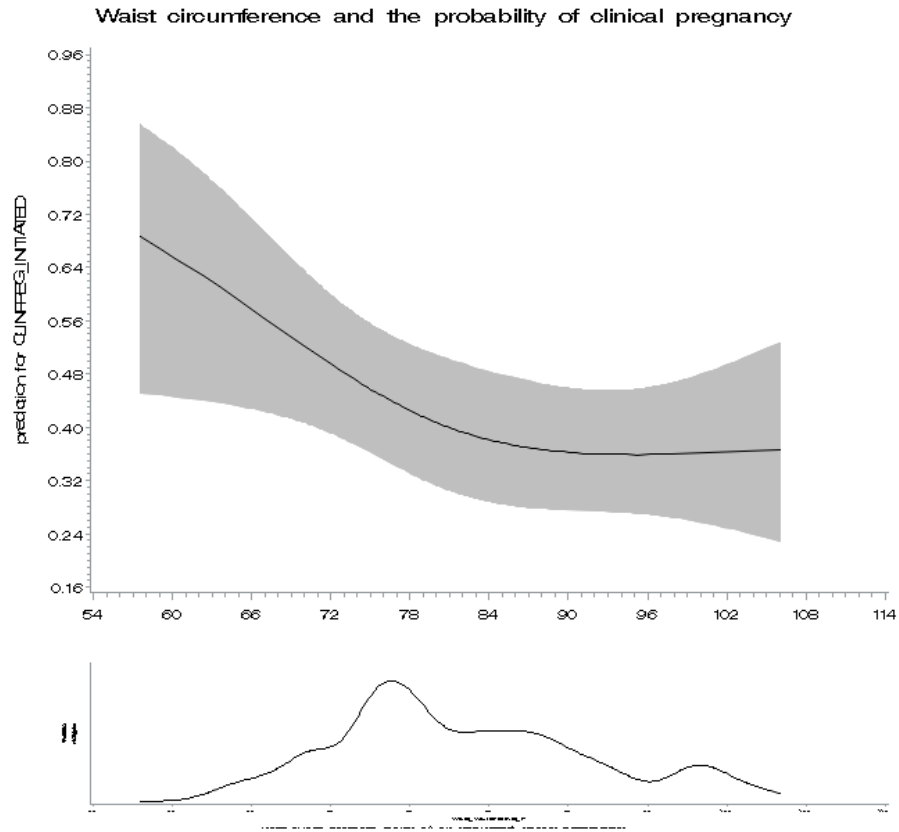

Figure S2. Restricted cubic spline plot of the association between waist circumference and probability of clinical pregnancy. P-value for non-linear relation: 0.19.

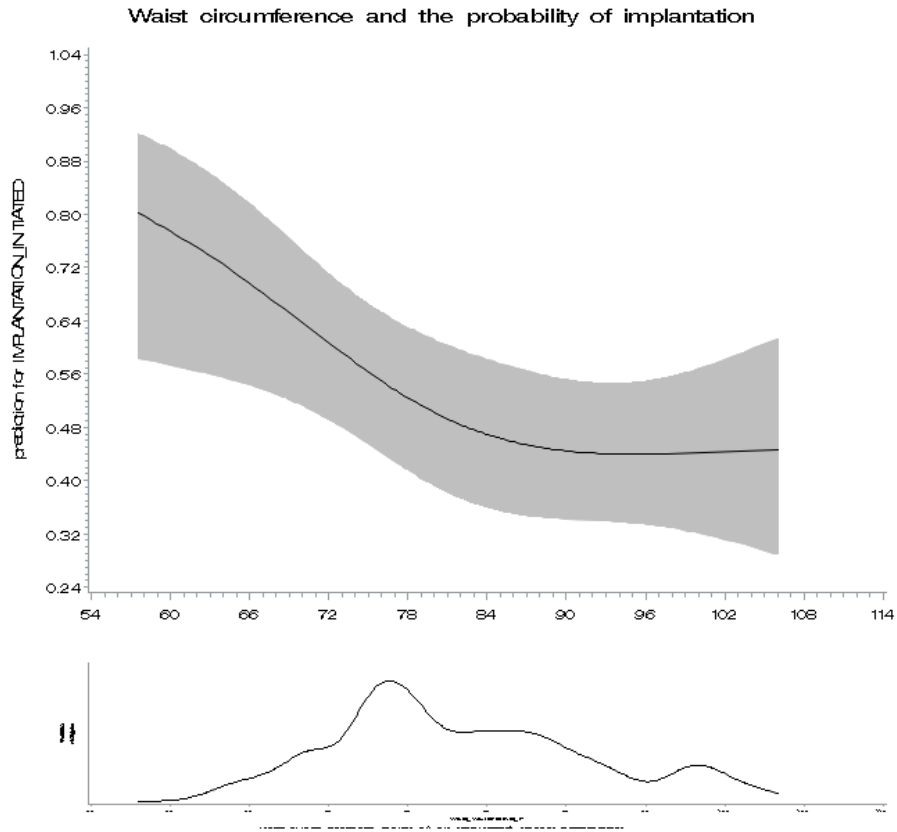

Figure S3. Restricted cubic spline plot of the association between waist circumference and probability of implantation. P-value for non-linear relation: 0.13
